# Supplementary material
Source: PubMed Central journal article supplement (PMC8459307)

## Supplemental Online Content

Veerabagu SA, Cheng B, Wang S, et al. Rates of opioid prescriptions obtained after Mohs surgery: a claims database analysis from 2009 to 2020. *JAMA Dermatol*. Published online September 22, 2021. doi:10.1001/jamadermatol.2021.3468

**eFigure.** Frequency of MMS encounters with opioids filled by geographic location (US Census Division) and year

This supplemental material has been provided by the authors to give readers additional information about their work.

**eFigure.** Frequency of MMS encounters with opioids filled by geographic location (US Census Division) and year

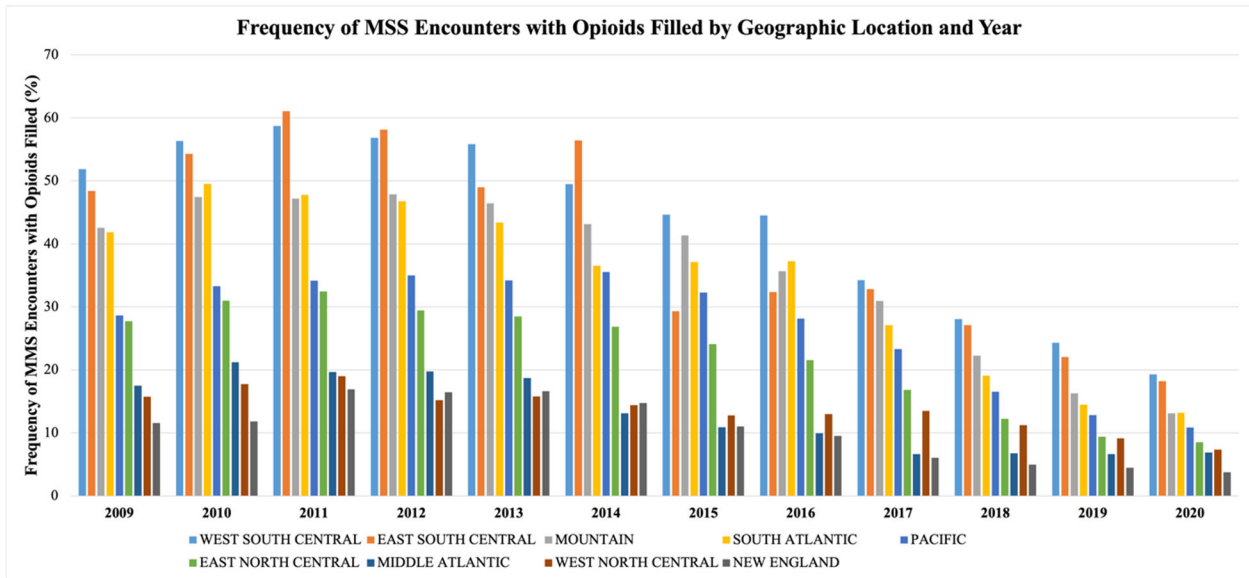

Supplement: jamadermatol-e213468-s001.pdf [file jamadermatol-e213468-s001.pdf]
